# Supplementary material
Source: PubMed Central journal article supplement (PMC5976519)
Supplement: NIHMS926481-supplement-supplement_1.pdf [file NIHMS926481-supplement-supplement_1.pdf]

Supplementary Materials

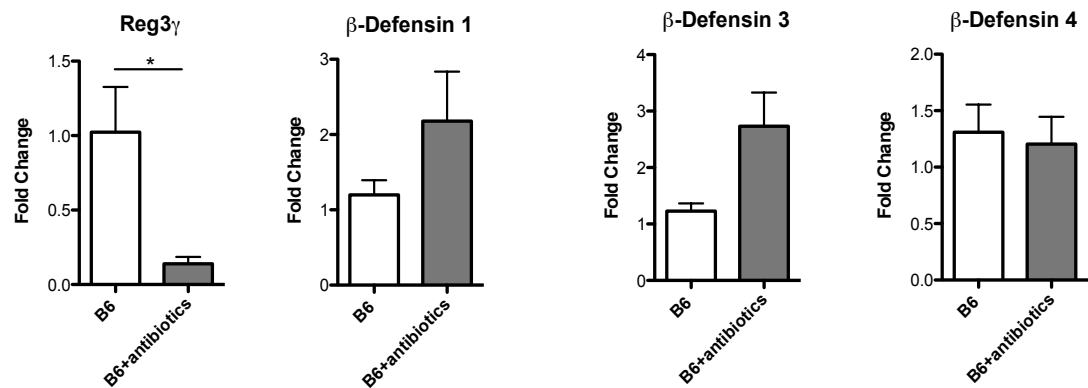

**Supplementary Figure 1. Antibiotics feeding decreases IEC expression of RegIII $\gamma$  but not  $\beta$ -defensins in vivo.** C57BL/6 mice were treated with broad-spectrum antibiotics for 10 days, IEC expression of RegIII $\gamma$  and  $\beta$ -defensins 1, 3, 4 was determined by qRT-PCR and normalized against gapdh. n=4 mice/group. \*p<0.05. Data are reflective of 2 independent experiments.

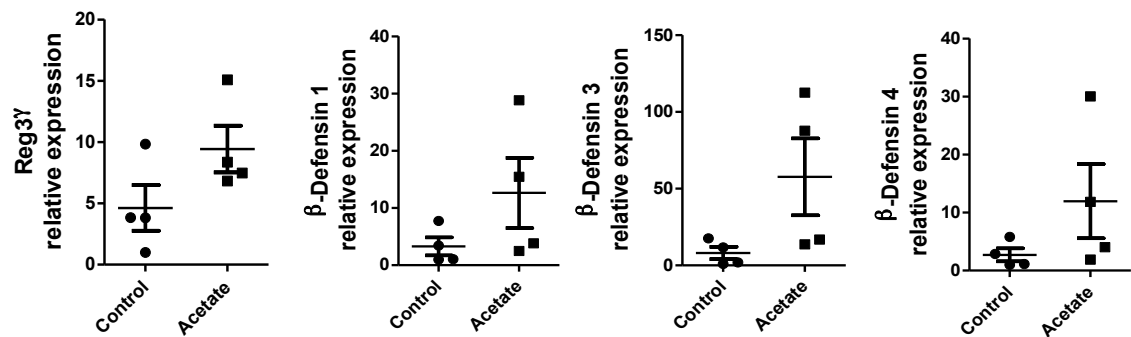

**Supplementary Figure 2. Acetate feeding slightly enhances IEC expression of RegIII $\gamma$  and  $\beta$ -defensins in vivo.** C57BL/6 mice were treated with antibiotics for 10 days, followed by 300 mM acetate for 21 days. IEC expression of RegIII $\gamma$  and  $\beta$ -defensins 1, 3, 4 was determined by qRT-PCR and normalized against gapdh. Data are reflective of 2 independent experiments. n=4 mice/group.

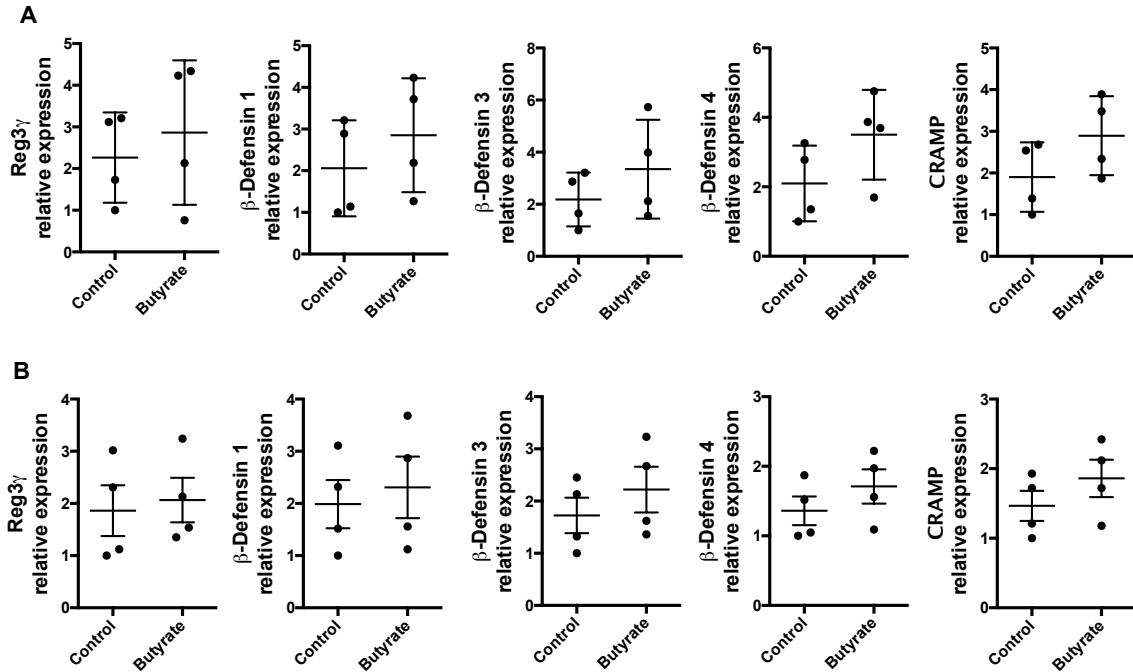

**Supplementary Figure 3. Butyrate feeding does not induce expression of RegIIIγ and β-defensins in IEC of mouse without depletion of gut bacteria.** WT and GPR43<sup>-/-</sup> C57BL/6 mice were fed with 300 mM butyrate for 21 days. IEC expression of RegIIIγ, β-defensins 1, 3, 4, and CRAMP in WT mice (A) and GPR43<sup>-/-</sup> mice (B) was determined by qRT-PCR and normalized against gapdh. Data are reflective of 2 independent experiments. n=4 mice/group.

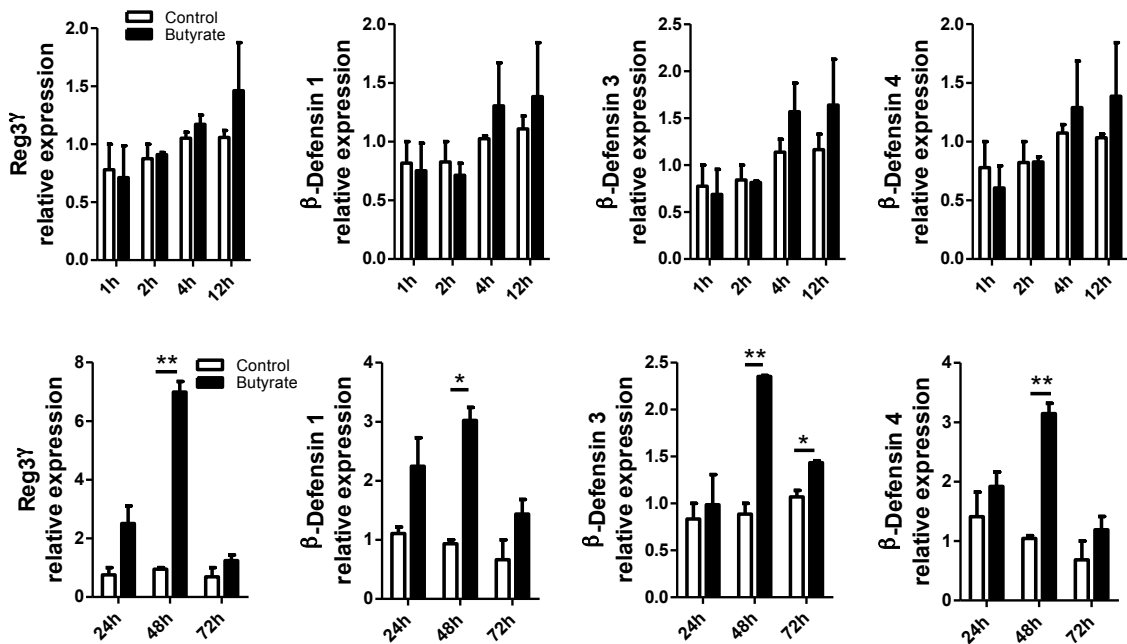

**Supplementary Figure 4. Butyrate induces expression of RegIIIγ and β-defensins in**

**mouse IEC.** MSIE cells were treated with 0.5 mM butyrate and the expression of RegIII $\gamma$  and  $\beta$ -defensins 1, 3 and 4 was determined by qRT-PCR at 1, 2, 4, 12, 24, 48, and 72 h. Data are normalized against gapdh. \* $p < 0.05$ ; \*\* $p < 0.01$ . Data are reflective of 3 independent experiments.

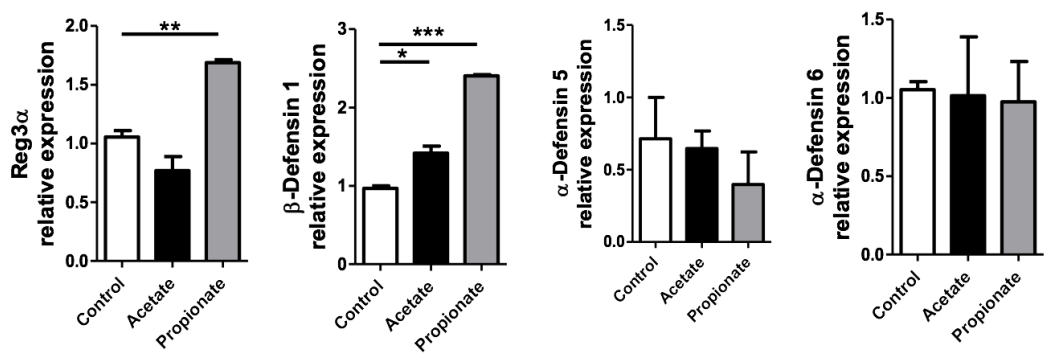

**Supplementary Figure 5. Propionate induces expression of RegIII $\alpha$  and  $\beta$ -defensin 1, but not  $\alpha$ -defensins and acetate induces  $\beta$ -defensin 1 in human IECs.** HT-29 cells were treated with 0.5 mM acetate or propionate for 48 h. The expression of  $\alpha$ -defensins 5 and 6,  $\beta$ -defensin 1 and RegIII $\alpha$  was determined by qRT-PCR and normalized against gapdh. \* $p < 0.05$ ; \*\* $p < 0.01$ ; \*\*\* $p < 0.001$ . Data are reflective of 3 independent experiments.

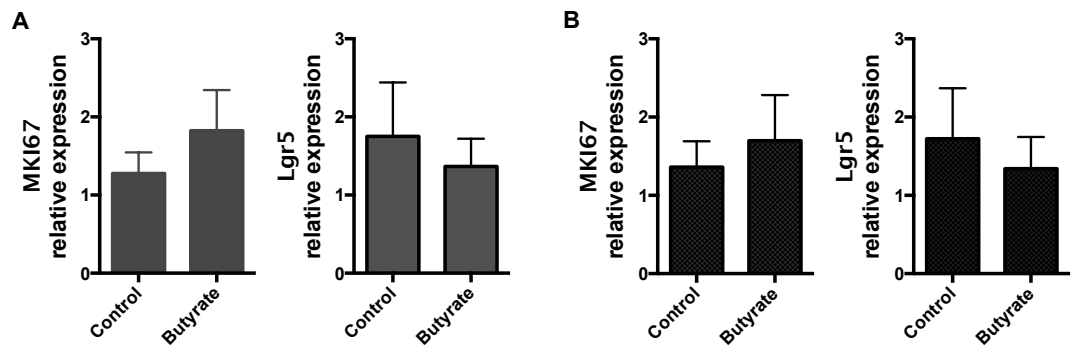

**Supplementary Figure 6. Butyrate does not affect expression of MKI67 and Lgr5 in intestinal epithelial enteroids.** Intestinal epithelial enteroids were generated from either WT or GPR43 $^{-/-}$  mice, and treated with 0.5 mM butyrate. The expression of MKI67 and Lgr5 in WT enteroids (A) and GPR43 $^{-/-}$  enteroids (B) was determined by qRT-PCR at 48 h and normalized against *gapdh*. Data are reflective of 2 independent experiments.

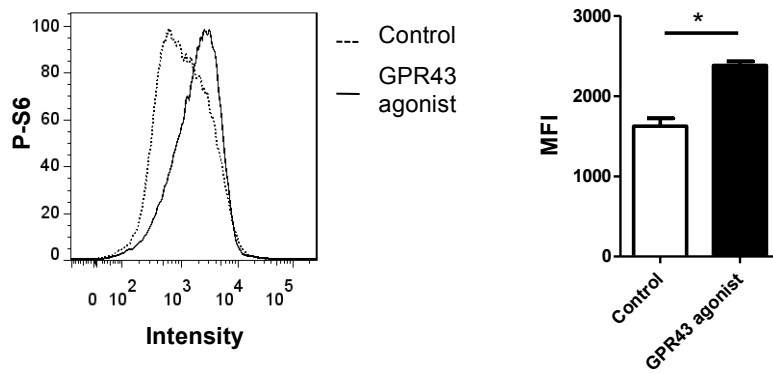

**Supplementary Figure 7. GPR43 agonist activates mTOR/S6K1 pathway in IECs.** MSIE cells were treated with 5  $\mu$ M GPR43 agonist for 48 h. The expression of phospho-S6K1 was determined by flow cytometry. Combined median fluorescence intensity (MFI) was presented. \* $p < 0.05$ . Data are reflective of 3 independent experiments.

**Supplementary Table 1. Lists of qRT-PCR primers**

|                       |         |                                    |
|-----------------------|---------|------------------------------------|
| mRegIII $\gamma$      | Forward | 5'-CGTGCCTATGGCTCCTATTGCT-3'       |
|                       | Reverse | 5'-TTCAGCGCCACTGAGCACAGAC-3'       |
| m $\beta$ -defensin-1 | Forward | 5'-TAGTCTCTTCATCTGTGTTTTTGCATA-3'  |
|                       | Reverse | 5'-TTCAGCGCCACTGAGCACAGAC-3'       |
| m $\beta$ -defensin-3 | Forward | 5'-CCAGGCTGATCCTATCCAGG-3'         |
|                       | Reverse | 5'-GTCCCATTCATGCGTTCTCT-3'         |
| m $\beta$ -defensin-4 | Forward | 5'-TGGCCTCCAAAGGAGATAGACA-3'       |
|                       | Reverse | 5'-AGGCTGATCCTATCCAAAACACA-3       |
| mCRAMP                | Forward | 5'-CAG CCC TTT CGG TTC AAG AA-3'   |
|                       | Reverse | 5'-CCC ACC TTT GCG GAG AAG T-5'    |
| mGAPDH                | Forward | 5'-CCATGGAGAAGGCTGGGG-3'           |
|                       | Reverse | 5'-CAAAGTTGTCATGGATGACC-3          |
| hRegIII $\alpha$      | Forward | 5'-TATGGCTCCCACTGCTATGCCT-3'       |
|                       | Reverse | 5'-TCTTCACCAGGGAGGACACGAA-3'       |
| h $\beta$ -defensin-1 | Forward | 5'-ATACTTCAAAGCAATTTTCCTTTAT-3'    |
|                       | Reverse | 5'-TTGTCTGAGATGGCCTCAGGTAAC-3'     |
| h $\beta$ -defensin-6 | Forward | 5'-CCTCACCATCCTCACTGCTGTTC-3'      |
|                       | Reverse | 5'-CCATGACAGTGCAGGTCCCATA-3'       |
| hLL-37                | Forward | 5'- TGC TAA CCT CTA CCG CCT CCT-3' |
|                       | Reverse | 5'- CAC AAT CCT CTG GTG ACT GCT-3' |
| hGAPDH                | Forward | 5'-GAAGGTCGGAGTCAACGGATT-3'        |
|                       | Reverse | 5'-CGCTCCTGGAAGATGGTAAT-3'         |
